# Supplementary material for: A Whole-Slide Image Managing Library Based on Fastai for Deep Learning in the Context of Histopathology: Two Use-Cases Explained
Source: MDPI journal article supplement (doi:10.3390/app12010013), 2021-12-21
Supplement: s1 [file s1]

# Supplementary Materials: A whole slide image managing library based on fastai for deep learning in the context of histopathology: Two use-cases explained

Christoph Neuner, Roland Coras, Ingmar Blümcke, Alexander Popp, Sven-Martin Schlaffer, Buchfelder Michael, Samir Jabari

| Dataset              | gonadotroph | corticotroph |
|----------------------|-------------|--------------|
| Patients             | 229         | 181          |
| All WSI <sup>1</sup> | 644         | 405          |
| H&E WSI              | 229         | 202          |
| ROIs                 | 7,796       | 5,373        |
| Tiles                | 206,517     | 63,893       |

<sup>1</sup> H&E and immunostained

**SUPPLEMENT S1 | Dataset** First, we selected 410 patients and identified one case of pituitary adenoma per patient. Then we scanned H&E-stained slides with their positive immunostained slides respectively. After that, ROIs with matching hormone expression in the immunostained slides were extracted from the H&E slides manually. After that the ROIs were split into smaller 1024x1024 pixel tiles via a self-written algorithm.

| Class distribution | cases | tiles |
|--------------------|-------|-------|
| ACTH               | 44.7% | 23.6% |
| silent ACTH        | 9.5%  | 9.7%  |
| LH                 | 49.0% | 59.3% |
| FSH                | 44.1% | 62.3% |
| LH or FSH          | 55.3% | 76.4% |

**SUPPLEMENT S2 | Class distribution** E.g. 23.6% means, that 23.6% of all tiles had the label ACTH. It was a multilabel classification problem. Only cases, where in the end tiles had been extracted from, were used for that calculation.

```
(0): AdaptiveConcatPool2d(
  (ap): AdaptiveAvgPool2d(output_size=1)
  (mp): AdaptiveMaxPool2d(output_size=1)
)
(1): Flatten()
(2): BatchNorm1d(4096, eps=1e-05, momentum=0.1, affine=True,
track_running_stats=True)
(3): Dropout(p=0.25, inplace=False)
(4): Linear(in_features=4096, out_features=512, bias=False)
(5): ReLU(inplace=True)
(6): BatchNorm1d(512, eps=1e-05, momentum=0.1, affine=True,
track_running_stats=True)
(7): Dropout(p=0.5, inplace=False)
(8): Linear(in_features=512, out_features=4/2, bias=False)
```

**SUPPLEMENT S3 | Custom head (PyTorch).** We used ResNext101/resnet50 as our final network architecture with weights pretrained on ImageNet. ImageNet has 1000 different classes. We only had 4/2. So, we had to change the head of the models, to only have 4/2 output probabilities. This is done conveniently by the fastai library. (4 outputs for the pituitary gland adenoma classifier and 2 outputs for the DNET-ganglioglioma classifier. The rest of the head was the same.)

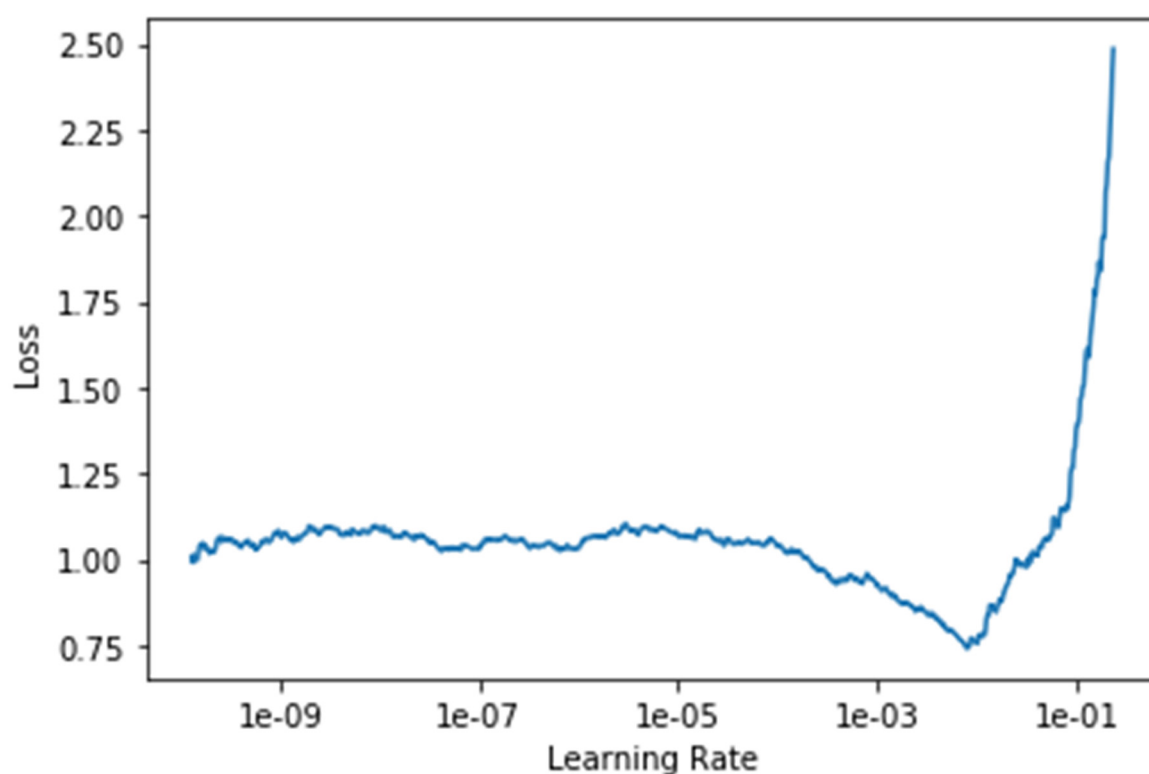

**SUPPLEMENT S4 | Learning rate finder pituitary adenoma classifier.** Ideally, a learning rate at the steepest part of the curve with a descending slope should be picked. Left: For training the head a maximum learning rate of  $10^{-3}$  was picked. Right: For training the body maximum differential learning rates between  $10^{-9}$  and  $10^{-6}$  were picked.

| Networks            | ACTH      | Silent ACTH | LH        | FSH       |
|---------------------|-----------|-------------|-----------|-----------|
| ResNet50            | 0.91/0.83 | 0.85/0.74   | 0.84/0.84 | 0.84/0.87 |
| ResNet101           | 0.90/0.85 | 0.83/0.76   | 0.82/0.85 | 0.83/0.85 |
| ResNet152           | 0.89/0.84 | 0.84/0.75   | 0.86/0.82 | 0.85/0.86 |
| DenseNet121         | 0.87/0.82 | 0.83/0.71   | 0.81/0.80 | 0.82/0.83 |
| Xception            | 0.85/0.87 | 0.95/0.81   | 0.85/0.90 | 0.75/0.81 |
| Inceptionv4         | 0.93/0.90 | 0.96/0.81   | 0.93/0.94 | 0.78/0.84 |
| se_ResNext101_32x4d | 0.96/0.87 | 0.93/0.81   | 0.95/0.94 | 0.89/0.87 |
| ResNext101_32x8d    | 0.93/0.96 | 0.96/0.96   | 0.91/0.90 | 0.87/0.90 |

**SUPPLEMENT S5 | Evaluated Networks.** We specified a validation and a test set. Then we trained this spectrum of network architectures and tried to optimize the accuracy on a case basis for the validation set. The final trained models were then evaluated on the test set. This table shows validation/test accuracy for the four classes. Our final choice fell on ResNext101, which was then trained and evaluated using 5-fold cross validation (see Supplement 6).

|                  | ACTH | Silent ACTH | LH   | FSH  | LH or FSH |
|------------------|------|-------------|------|------|-----------|
| Validation set 1 | 0.94 | 0.97        | 0.98 | 0.95 | 0.98      |

|                  |      |      |      |      |      |
|------------------|------|------|------|------|------|
| Validation set 2 | 0.99 | 0.90 | 0.95 | 0.93 | 0.98 |
| Validation set 3 | 0.97 | 0.89 | 1.00 | 0.94 | 1.00 |
| Validation set 4 | 0.94 | 0.98 | 0.98 | 0.94 | 1.00 |
| Validation set 5 | 0.99 | 0.98 | 0.97 | 0.89 | 0.99 |

**SUPPLEMENT S6 | AUCs of the ROC-curves for the five validation sets of 5-fold cross-validation.** *We trained and evaluated ResNext101 using 5-fold cross validation. We let each model predict its validation set respectively and calculated the labels on a case basis to finally compute AUCs for each class.*

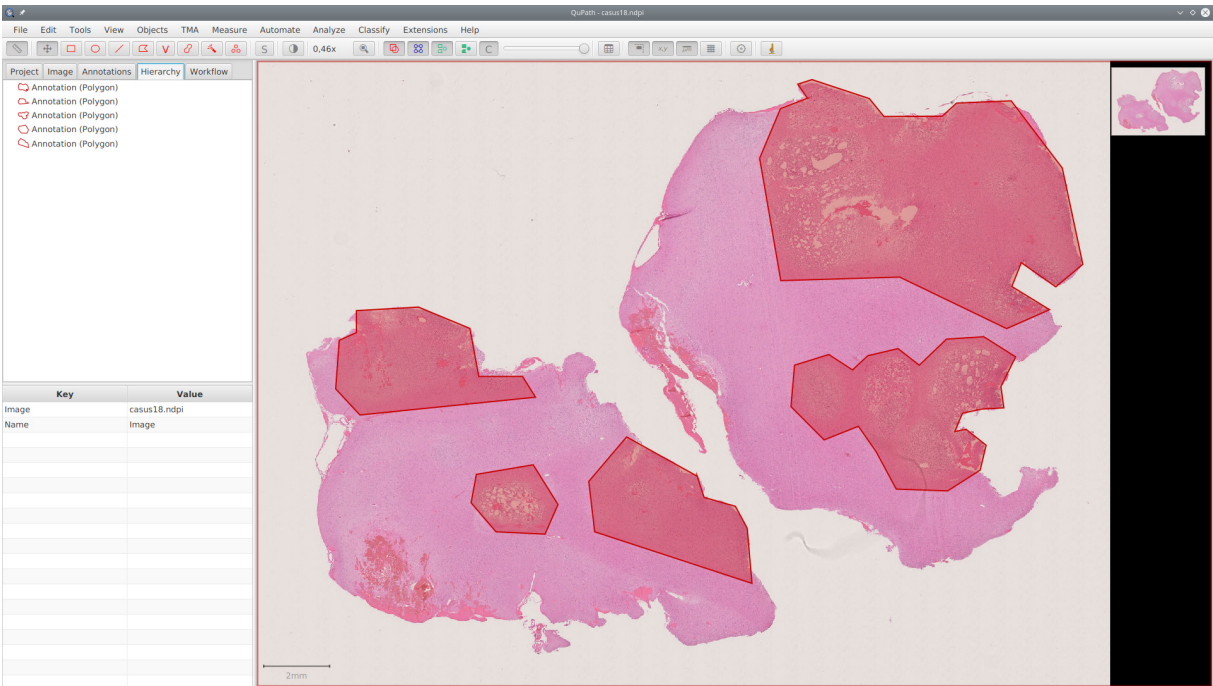

**SUPPLEMENT S7 | QuPath Defining regions of interest in QuPath**

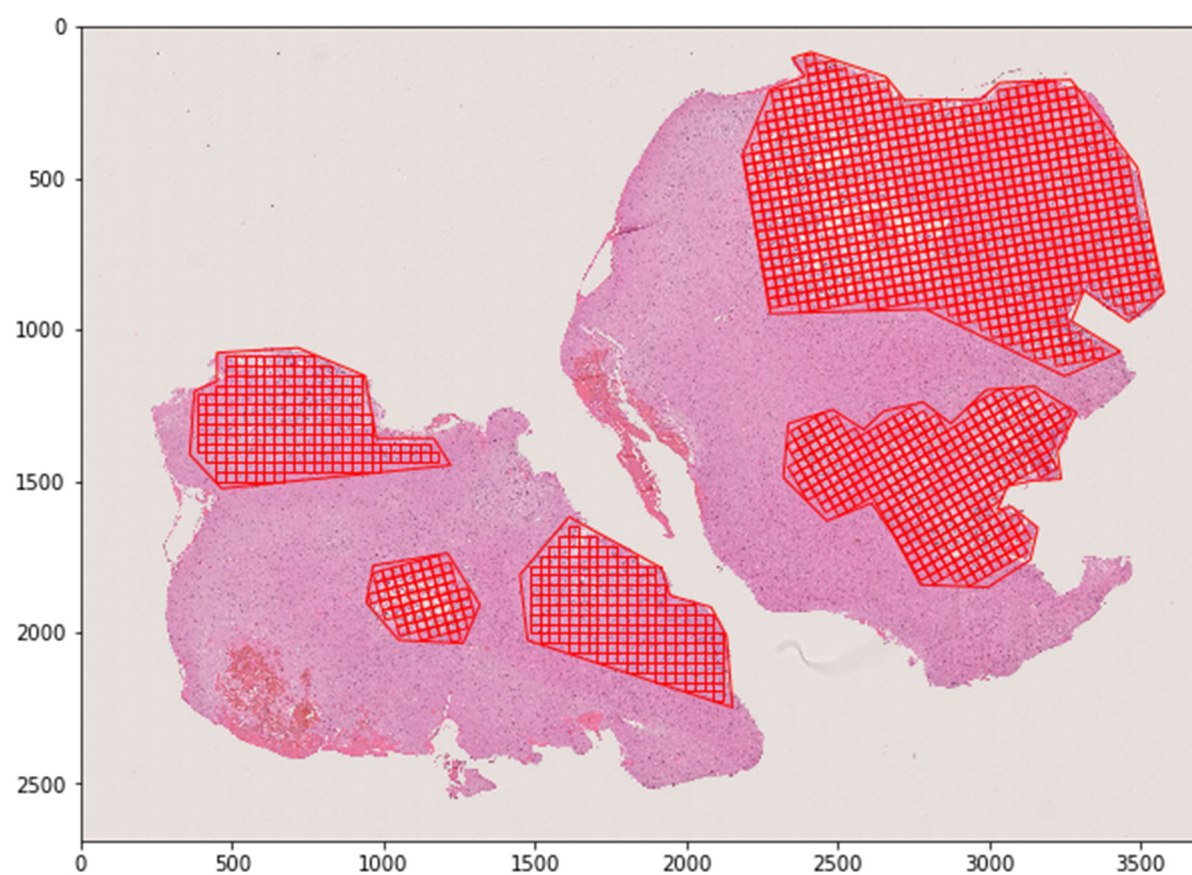

**SUPPLEMENT S8 | ROIs with overlaid grids** Over each ROI a grid with all possible tile locations is drawn.

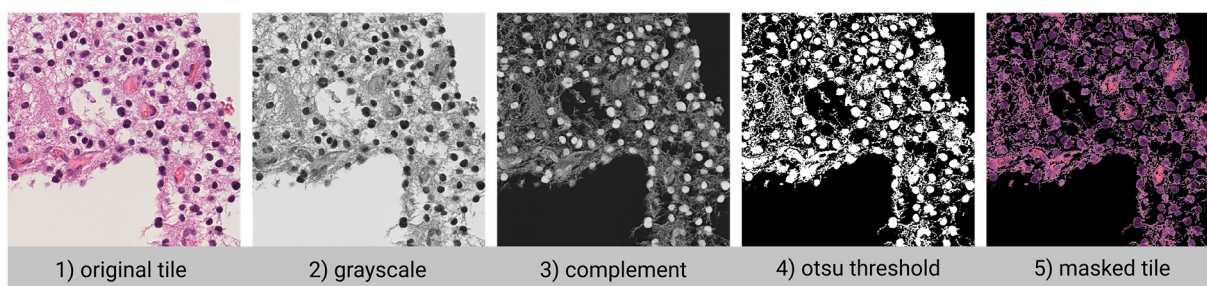

**SUPPLEMENT S9 | Tissue filtering** Separate tissue from background.

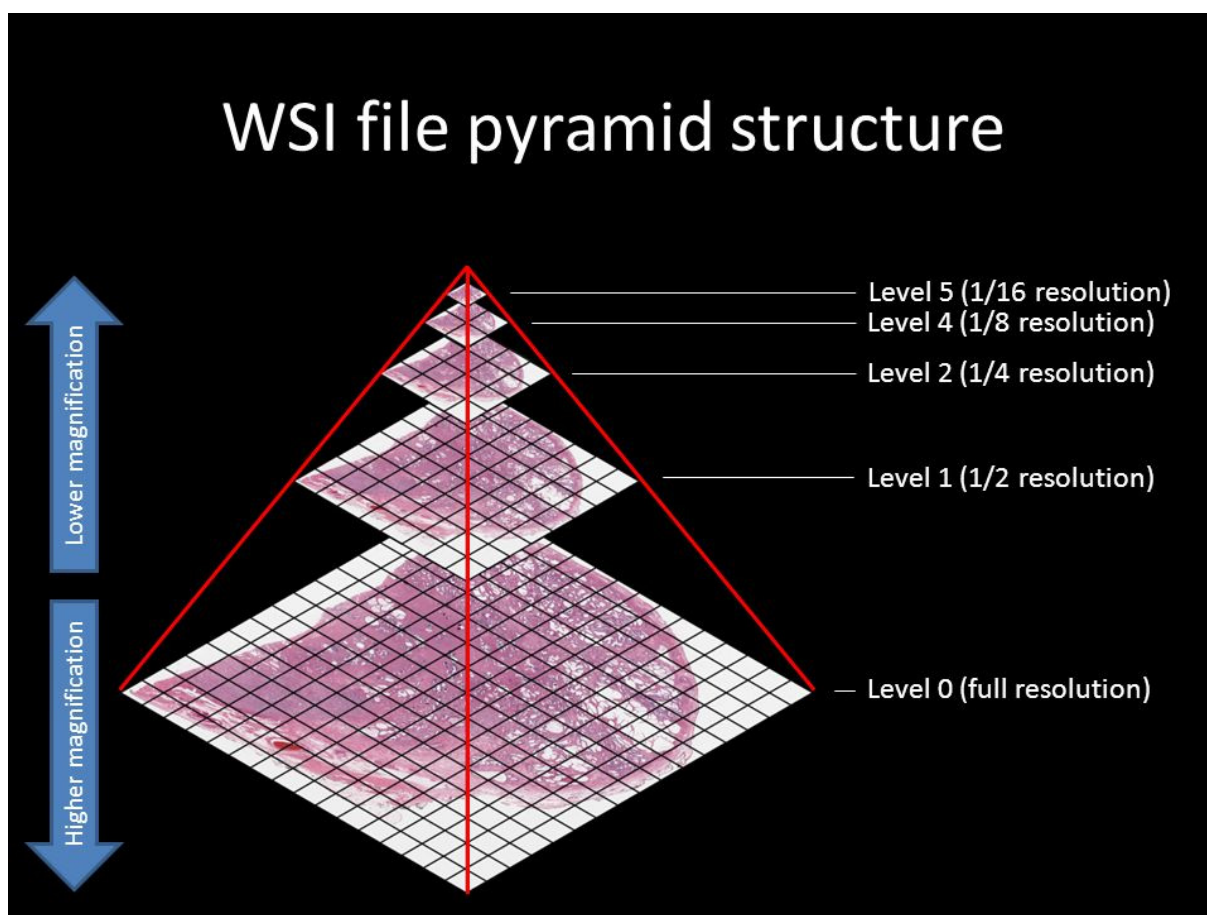

**SUPPLEMENT S10** | WSI file pyramid structure
